# Supplementary material for: Long-Standing Motor and Sensory Recovery following Acute Fibrin Sealant Based Neonatal Sciatic Nerve Repair
Source: Neural Plast. 2016 Jun 29;2016:9028126. doi: 10.1155/2016/9028126 (PMC4942656; doi:10.1155/2016/9028126)
Supplement: Supplementary file 1 — Supplementary material represents additional experiments/illustrations provided to give additional support to the main results of the present work. [file 9028126.f1.pdf]

## Supplementary data

**Table S1** - Percentage of motoneuron survival (ipsi/contralateral ratio) following P2 sciatic nerve transection and repair. Mean $\pm$ SE.

| Survival time<br>(weeks post lesion) | AX               | AX+FS            | AX+CFS           |
|--------------------------------------|------------------|------------------|------------------|
| 4                                    | 20.42 $\pm$ 1.40 | 50.23 $\pm$ 3.68 | 49.40 $\pm$ 1.24 |
| 8                                    | 18.23 $\pm$ 2.67 | 43.64 $\pm$ 2.24 | 53.12 $\pm$ 3.72 |
| 12                                   | 16.81 $\pm$ 1.47 | 47.43 $\pm$ 1.34 | 48.93 $\pm$ 3.39 |

**Table S2** – Synaptophysin relative immunoreactivity (ipsi/contralateral ratio) obtained by measurement of the integrated density of pixels at lamina IX ventral horn spinal cord, following P2 sciatic nerve transection and repair. Mean $\pm$ SE.

| Survival time<br>(weeks post lesion) | AX              | AX+FS           | AX+CFS          |
|--------------------------------------|-----------------|-----------------|-----------------|
| 4                                    | 0.25 $\pm$ 0.02 | 0.61 $\pm$ 0.05 | 0.95 $\pm$ 0.01 |
| 8                                    | 0.41 $\pm$ 0.03 | 0.71 $\pm$ 0.05 | 0.87 $\pm$ 0.03 |
| 12                                   | 0.35 $\pm$ 0.01 | 0.79 $\pm$ 0.05 | 0.88 $\pm$ 0.03 |

**Table S3** – Glial fibrillary acidic protein (GFAP) relative immunoreactivity (ipsi/contralateral ratio) obtained by measurement of the integrated density of pixels at lamina IX ventral horn spinal cord, following P2 sciatic nerve transection and repair. Mean $\pm$ SE.

| Survival time<br>(weeks post lesion) | AX              | AX+FS           | AX+CFS          |
|--------------------------------------|-----------------|-----------------|-----------------|
| 4                                    | 2.12 $\pm$ 0.18 | 1.67 $\pm$ 0.12 | 1.58 $\pm$ 0.15 |
| 8                                    | 1.78 $\pm$ 0.20 | 1.30 $\pm$ 0.10 | 1.31 $\pm$ 0.08 |

|           |           |           |           |
|-----------|-----------|-----------|-----------|
| <b>12</b> | 1.62±0.08 | 1.37±0.10 | 1.51±0.15 |
|-----------|-----------|-----------|-----------|

**Table S4** – Ionized calcium-binding adapter molecule 1 (Iba1) relative immunoreactivity (ipsi/contralateral ratio) obtained by measurement of the integrated density of pixels at lamina IX ventral horn spinal cord, following P2 sciatic nerve transection and repair. Mean±SE.

| <b>Survival time<br/>(weeks post lesion)</b> | <b>AX</b> | <b>AX+FS</b> | <b>AX+CFS</b>    |
|----------------------------------------------|-----------|--------------|------------------|
| <b>4</b>                                     | 1.49±0.06 | 1.07±0.05    | 1.07±0.03        |
| <b>8</b>                                     | 1.21±0.09 | 1.14±0.05    | 1.19±0.08        |
| <b>12</b>                                    | 0.90±0.27 | 1.24±0.04    | <b>1.15±0.05</b> |

**Table S5** - Estimated number of regenerated myelinated axons following P2 sciatic nerve transection and repair. Mean±SE.

| <b>Survival time<br/>(weeks post lesion)</b> | <b>AX+FS</b> | <b>AX+CFS</b> | <b>Contralateral</b> |
|----------------------------------------------|--------------|---------------|----------------------|
| <b>4</b>                                     | 2,129±579    | 2,881±304     | 6,776±183            |
| <b>8</b>                                     | 1,999±235    | 2,508±590     | 8,131±437            |
| <b>12</b>                                    | 2,119±284    | 3,156±510     | 8,458±386            |

## Supplementary Figures

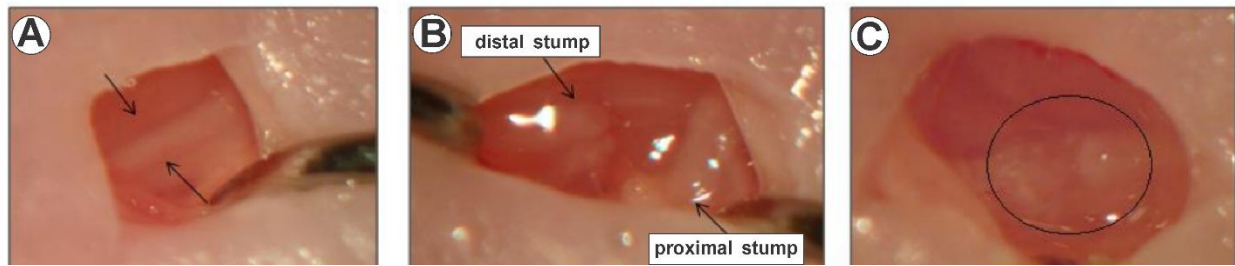

**Figure S1.** Neonatal sciatic nerve repair technique, by stump reapposition and application of fibrin sealant. **A.** Arrows indicate intact sciatic nerve previously to transection. **B.** transected sciatic nerve. Arrows indicate proximal and distal stumps previously to repair; **C.** nerve coaptation with fibrin sealant. Circle indicates fibrin matrix connecting the stumps.

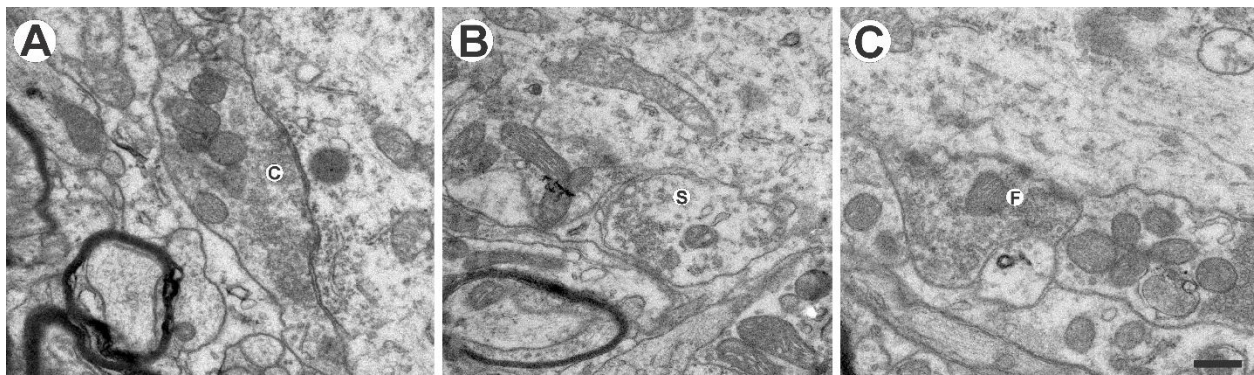

**Figure S2.** Representative transmission electron micrographs of S-, C-, and F-type terminals. **A.** Cholinergic bouton (C-type). **B.** Glutamatergic bouton (S-type). **C.** Glycine/GABA bouton (F-type). Scale: 500nm.

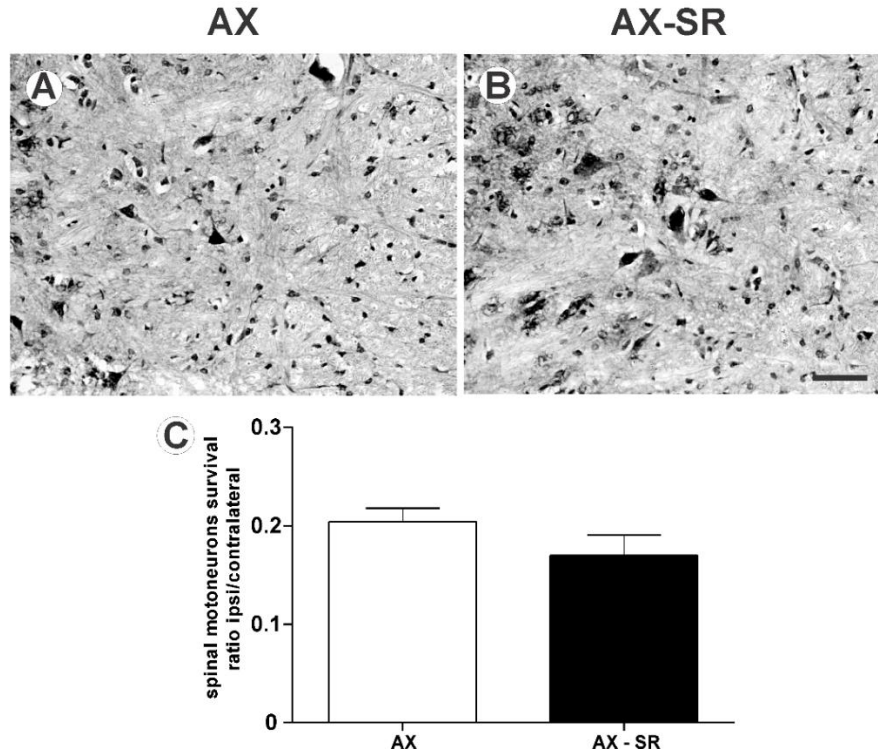

**Figure S3.** Nissl-stained spinal cord transverse sections at lamina IX illustrating the effect on motoneurons 4 weeks following P2 sciatic nerve transection. **A.** Group AX (axotomy, which a 2mm segment of the proximal stump was resected); **B.** Group AX-SR (axotomy, following stump reapposition); **C.** Ratio of neuronal survival four weeks following P2 sciatic nerve transection. Note that there is no difference between both groups. Mean $\pm$ SE.

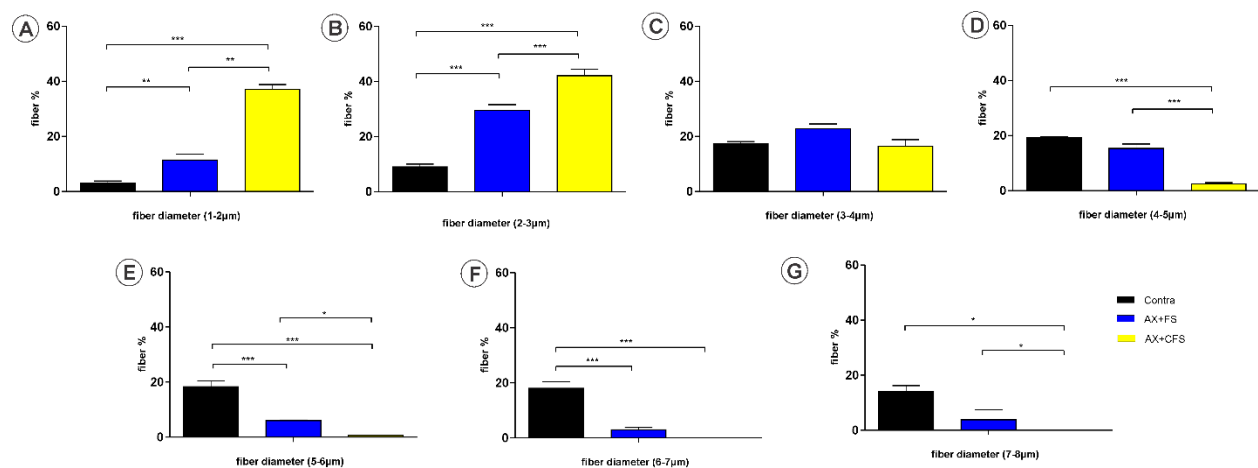

**Figure S4.** Quantitative analysis of regenerated fibers diameter, 4 weeks following P2 sciatic nerve transection and repair. Statistical differences between groups among frequency intervals (1-8 μm). Note larger fiber diameter in the group AX+FS as compared to AX+CFS. Contralateral- non-lesioned sciatic nerve; AX+FS - axotomy followed by coaptation with fibrin sealant derived from snake venom; AX+CFS - axotomy followed by coaptation with commercial fibrin sealant. Mean $\pm$ SE.

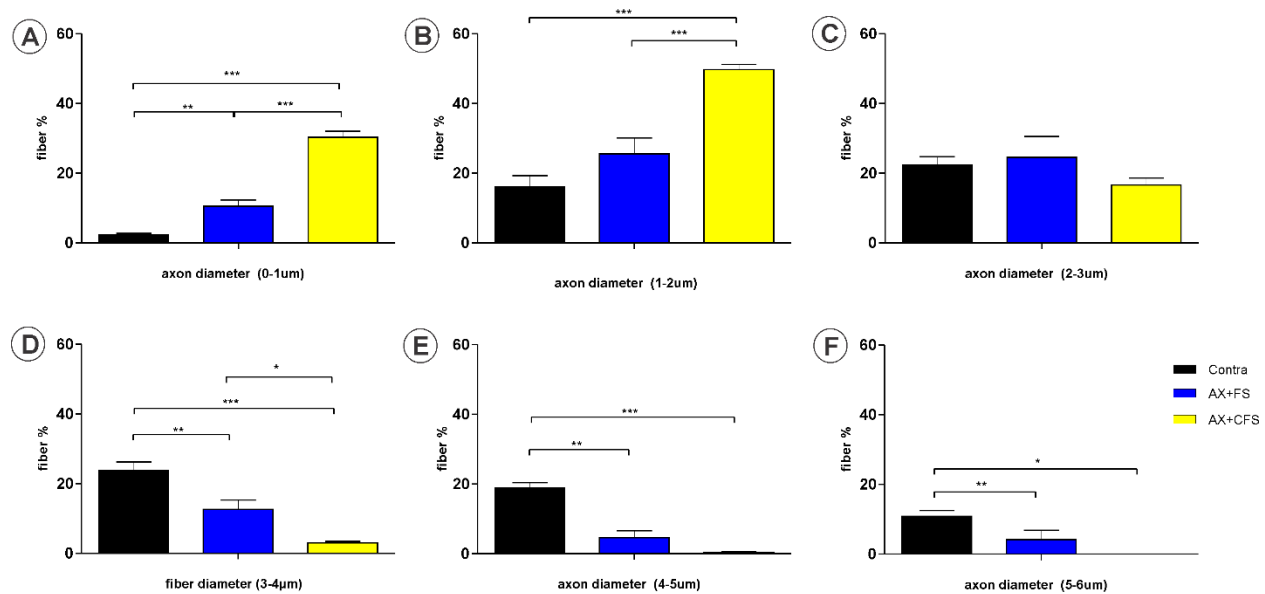

**Figure S5.** Quantitative analysis of regenerated axon diameter of, 4 weeks following P2 sciatic nerve transection and repair. Statistical differences between groups among specific diameters (0-6µm). Note the presence of larger fibers in the group AX+FS as compared to the group AX+CFS. Contralateral - non-lesioned sciatic nerve; AX+FS - axotomy followed by coaptation with fibrin sealant derived from snake venom; AX+CFS - axotomy followed by coaptation with commercial fibrin sealant. Mean±SE.

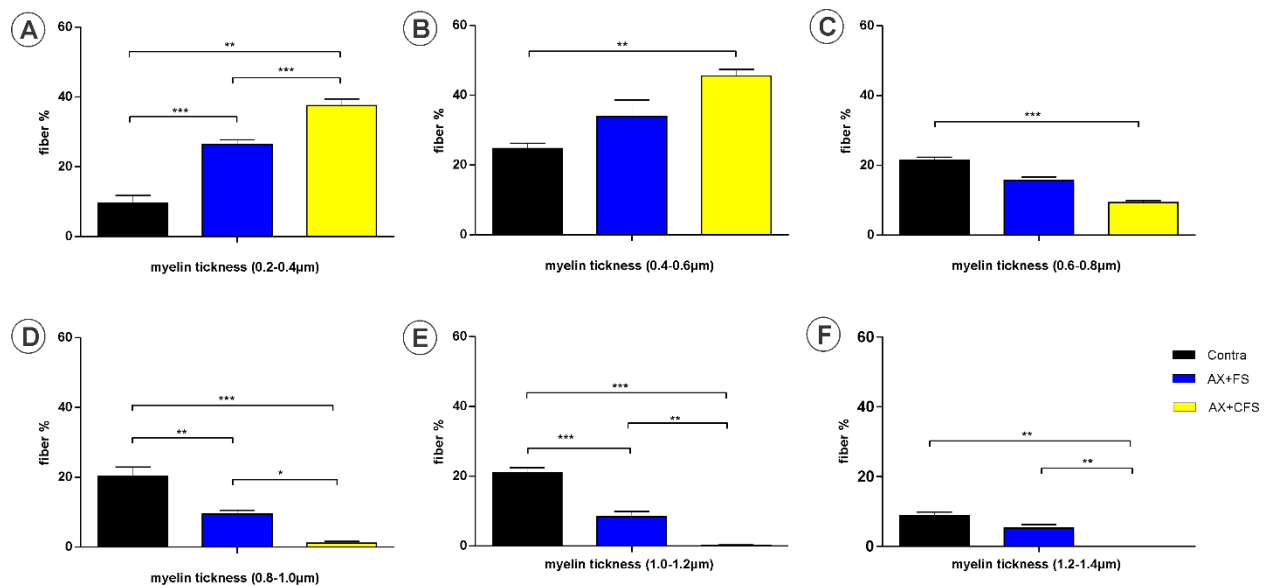

**Figure S6.** Quantitative analysis of myelin thickness of regenerated fibers, 4 weeks following P2 sciatic nerve transection and repair. Statistical differences between groups in specific thickness frequency intervals (0.2-1.4µm). Note increase of larger myelin thickness in the group AX+FS than in the group AX+CFS. Contralateral - non-lesioned sciatic nerve; AX+FS - axotomy followed by coaptation with fibrin sealant derived from snake venom; AX+CFS - axotomy followed by coaptation with commercial fibrin sealant. Mean±SE.
